# Supplementary material for: Genome-Wide Fine-Scale Recombination Rate Variation in Drosophila melanogaster
Source: PLOS journal article supplement (doi:10.1371/journal.pgen.1003090), 2012-12-20
Supplement: S27 (10.1371/journal.pgen.1003090.s027) [file journal.pgen.1003090.s027]

# Supporting Information

## Genome-wide fine-scale recombination rate variation in *Drosophila melanogaster*

Andrew H. Chan<sup>1,\*</sup>, Paul A. Jenkins<sup>1,\*</sup>, Yun S. Song<sup>1,2,\*\*</sup>

<sup>1</sup> Computer Science Division, University of California, Berkeley, CA, USA

<sup>2</sup> Department of Statistics, University of California, Berkeley, CA, USA

\* These authors contributed equally to this work

\*\* Corresponding author e-mail: yss@cs.berkeley.edu

### Text S1

#### Two-locus recursion relation

Suppose we sample  $n$  haplotypes, observing their alleles at each of two loci and obtaining configuration  $\mathbf{n} = (\mathbf{a}, \mathbf{b}, \mathbf{c})$ . Here  $\mathbf{c} = (c_{ij})$  is a matrix of the counts of haplotypes for which both alleles were observed;  $c_{ij}$  is the number of haplotypes with allele  $i$  at the first locus and allele  $j$  at the second locus. We also allow for the possibility that a haplotype had data missing at one locus:  $\mathbf{a} = (a_i)_{i=1,\dots,K}$  is the vector of counts of haplotypes with allele  $i$  observed at the first locus and missing data at the second locus, and  $\mathbf{b} = (b_j)_{j=1,\dots,L}$  is the vector of counts of haplotypes with allele  $j$  observed at the second locus and missing data at the first locus. Further, let:

$$\begin{aligned} a &= \sum_{i=1}^K a_i, & c_{i\cdot} &= \sum_{j=1}^L c_{ij}, & c &= \sum_{i=1}^K \sum_{j=1}^L c_{ij}, \\ b &= \sum_{j=1}^L b_j, & c_{\cdot j} &= \sum_{i=1}^K c_{ij}, & n &= a + b + c. \end{aligned}$$

The probability that, when we sample  $n$  haplotypes in some fixed order, we obtain a set consistent with configuration  $\mathbf{n}$ , is denoted by  $q(\mathbf{n}; \theta_A, \theta_B, \rho)$ . This probability is a function of  $\theta_A$ ,  $\theta_B$ , and  $\rho$ : the mutation rates at the two loci, and the recombination rate between them. The respective mutation transition matrices at the two loci, which we denote  $\mathbf{P}^A$  and  $\mathbf{P}^B$ , are fixed. A system of equations for  $q(\mathbf{n}; \theta_A, \theta_B, \rho)$  is given in [1]. We denote by  $q(\mathbf{n}, s_1, s_2; \theta_A, \theta_B, \rho)$  the joint probability of obtaining  $\mathbf{n}$  with the events that there were precisely  $s_1$  mutations in the history of the sample at the first locus and  $s_2$  mutations in the history of the sample at the second locus. The corresponding system of equations for  $q(\mathbf{n}, s_1, s_2; \theta_A, \theta_B, \rho)$  is:

$$\begin{aligned} &[n(n-1) + \theta_A(a+c) + \theta_B(b+c) + \rho c]q((\mathbf{a}, \mathbf{b}, \mathbf{c}), s_1, s_2; \theta_A, \theta_B, \rho) = \\ &\sum_{i=1}^K a_i(a_i - 1 + 2c_{i\cdot})q((\mathbf{a} - \mathbf{e}_i, \mathbf{b}, \mathbf{c}), s_1, s_2; \theta_A, \theta_B, \rho) + \sum_{j=1}^L b_j(b_j - 1 + 2c_{\cdot j})q((\mathbf{a}, \mathbf{b} - \mathbf{e}_j, \mathbf{c}), s_1, s_2; \theta_A, \theta_B, \rho) \\ &+ \sum_{i=1}^K \sum_{j=1}^L [c_{ij}(c_{ij} - 1)q((\mathbf{a}, \mathbf{b}, \mathbf{c} - \mathbf{e}_{ij}), s_1, s_2; \theta_A, \theta_B, \rho) + 2a_i b_j q((\mathbf{a} - \mathbf{e}_i, \mathbf{b} - \mathbf{e}_j, \mathbf{c} + \mathbf{e}_{ij}), s_1, s_2; \theta_A, \theta_B, \rho)] \\ &+ \theta_A \sum_{i=1}^K \left[ \sum_{j=1}^L c_{ij} \sum_{t=1}^K P_{ti}^A q((\mathbf{a}, \mathbf{b}, \mathbf{c} - \mathbf{e}_{ij} + \mathbf{e}_{tj}), s_1 - 1, s_2; \theta_A, \theta_B, \rho) \right. \end{aligned}$$

$$\begin{aligned}
& + a_i \sum_{t=1}^K P_{ti}^A q((\mathbf{a} - \mathbf{e}_i + \mathbf{e}_t, \mathbf{b}, \mathbf{c}), s_1 - 1, s_2; \theta_A, \theta_B, \rho) \Big] \\
& + \theta_B \sum_{j=1}^L \left[ \sum_{i=1}^K c_{ij} \sum_{t=1}^L P_{tj}^B q((\mathbf{a}, \mathbf{b}, \mathbf{c} - \mathbf{e}_{ij} + \mathbf{e}_{it}), s_1, s_2 - 1; \theta_A, \theta_B, \rho) \right. \\
& \quad \left. + b_j \sum_{t=1}^L P_{tj}^B q((\mathbf{a}, \mathbf{b} - \mathbf{e}_j + \mathbf{e}_t, \mathbf{c}), s_1, s_2 - 1; \theta_A, \theta_B, \rho) \right] \\
& + \rho \sum_{i=1}^K \sum_{j=1}^L c_{ij} q((\mathbf{a} + \mathbf{e}_i, \mathbf{b} + \mathbf{e}_j, \mathbf{c} - \mathbf{e}_{ij}), s_1, s_2; \theta_A, \theta_B, \rho), \tag{1}
\end{aligned}$$

where  $\mathbf{e}_{ij}$  is a unit matrix whose  $(i, j)$ th entry is one and the rest are zero. As before, we suppose that we know the identity of the ancestral allele at each locus, say  $\lambda_A$  and  $\lambda_B$  at locus A and B, respectively. Then we replace the relevant instances of (1) with the following:

$$\begin{aligned}
q((\mathbf{0}, \mathbf{b}, \mathbf{e}_{ij}), s_1, s_2; \theta_A, \theta_B, \rho) &= \begin{cases} q((\mathbf{0}, \mathbf{b} + \mathbf{e}_j, \mathbf{0}), 0, s_2; \theta_A, \theta_B, \rho) & \text{if } i = \lambda_A \text{ and } s_1 = 0, \\ 0 & \text{otherwise,} \end{cases} \\
q((\mathbf{a}, \mathbf{0}, \mathbf{e}_{ij}), s_1, s_2; \theta_A, \theta_B, \rho) &= \begin{cases} q((\mathbf{a} + \mathbf{e}_i, \mathbf{0}, \mathbf{0}), s_1, 0; \theta_A, \theta_B, \rho) & \text{if } j = \lambda_B \text{ and } s_2 = 0, \\ 0 & \text{otherwise,} \end{cases} \\
q((\mathbf{e}_i, \mathbf{0}, \mathbf{0}), s_1, s_2; \theta_A, \theta_B, \rho) &= \begin{cases} 1 & \text{if } i = \lambda_A \text{ and } s_1 = s_2 = 0, \\ 0 & \text{otherwise,} \end{cases} \\
q((\mathbf{0}, \mathbf{e}_j, \mathbf{0}), s_1, s_2; \theta_A, \theta_B, \rho) &= \begin{cases} 1 & \text{if } j = \lambda_B \text{ and } s_1 = s_2 = 0, \\ 0 & \text{otherwise.} \end{cases} \tag{2}
\end{aligned}$$

## Padé summation

Modifications to the approach described in [2] are made, following from the boundary conditions given above. These can be converted into modifications of entries of the dynamic programming tables given in [2]. For example, using (2) we have that

$$\begin{aligned}
q((\mathbf{a}, \mathbf{0}, \mathbf{e}_{i\lambda_B}), 1, 0; \theta_A, \theta_B, \rho) &= q((\mathbf{a} + \mathbf{e}_i, \mathbf{0}, \mathbf{0}), 1, 0; \theta_A, \theta_B, \rho) \\
&= q(\mathbf{a} + \mathbf{e}_i, 1; \theta_A) + \frac{0}{\rho} + \frac{0}{\rho^2} + \dots,
\end{aligned}$$

where  $q(\mathbf{a} + \mathbf{e}_i, 1; \theta_A)$  is the one-locus solution given by equation (3) in the main text. Notice that this expansion is in fact independent of  $\rho$ , from which it follows (by comparison with eq. (3.7) of [2]) that a number of entries in the dynamic programming tables are modified. For example, the second row in the dynamic programming table for the configuration  $(\mathbf{a}, \mathbf{0}, \mathbf{e}_{i\lambda_B})$  is set to zero. Other boundary conditions may be interpreted in a similar fashion.

## Ancestral allele estimation

Suppose we have one genomic sequence of *D. simulans* and  $n$  sequences of *D. melanogaster*. Let  $S$  represent the sequence of *D. simulans* and  $M^{(k)}$  represent the sequence of the  $k$ th *D. melanogaster*, where  $S_l$  denotes the  $l$ th base of the sequence, and  $S_{\hat{l}}$  represents the sequence with the exclusion of the  $l$ th base. Given  $(S, M^{(k)})$ , let  $T_l^{(k)}$  be the time to the most recent common ancestor (TMRCA) at locus  $l$ ;  $f_l^{(k)}(t | M_{\hat{l}}, S_{\hat{l}})$  be the density of the TMRCA conditioned on both their sequences but *excluding* the  $l$ th locus; and  $A_l^{(k)}$  be the ancestral allele at the  $l$ th locus, i.e., the allele of the most recent common ancestor (MRCA).

To compute the distribution on the ancestral allele at the  $l$ th locus conditioned on  $M^{(k)}$  and  $S$ , we use

Bayes' theorem to obtain

$$\begin{aligned}
& \mathbb{P}(A_l^{(k)} = i \mid M^{(k)}, S) \\
&= \frac{\int_0^\infty p(A_l^{(k)} = i, M^{(k)}, S, T_l^{(k)} = t) dt}{\mathbb{P}(M^{(k)}, S)} \\
&= \frac{\int_0^\infty \mathbb{P}(M_l^{(k)}, S_l^{(k)} \mid A_l^{(k)} = i, T_l^{(k)}) p(A_l^{(k)} = i, T_l^{(k)} = t) dt}{\mathbb{P}(M^{(k)}, S)} \\
&= \frac{\int_0^\infty \mathbb{P}(M_l^{(k)} \mid A_l^{(k)} = i, T_l^{(k)} = t) \mathbb{P}(S_l \mid A_l^{(k)} = i, T_l^{(k)} = t) \mathbb{P}(A_l^{(k)} = i) f_l^{(k)}(t \mid M_l^{(k)}, S_l) dt}{\sum_j \int_0^\infty \mathbb{P}(M_l^{(k)} \mid A_l^{(k)} = j, T_l^{(k)} = t) \mathbb{P}(S_l \mid A_l^{(k)} = j, T_l^{(k)} = t) \mathbb{P}(A_l^{(k)} = j) f_l^{(k)}(t \mid M_l^{(k)}, S_l) dt}. \quad (3)
\end{aligned}$$

In equation (3), the prior on the ancestral allele at locus  $l$ ,  $\mathbb{P}(A_l^{(k)} = i)$ , is given by the stationary distribution of the allele frequencies from the mutation matrix  $\mathbf{P}$ . (In the above,  $p$  denotes a joint probability of discrete events together with the density for  $T_l^{(k)}$ .) The density on the TMRCA,  $f_l^{(k)}(t \mid M_l^{(k)}, S_l)$ , is estimated using Li & Durbin's `psmc` [3]. In practice, we use `psmc` to compute  $f_l^{(k)}(t \mid M^{(k)}, S)$  and assume  $f_l^{(k)}(t \mid M^{(k)}, S) \approx f_l^{(k)}(t \mid M_l^{(k)}, S_l)$ .

The remaining two probabilities,  $\mathbb{P}(M_l^{(k)} \mid A_l^{(k)} = i, T_l^{(k)} = t)$  and  $\mathbb{P}(S_l \mid A_l^{(k)} = i, T_l^{(k)} = t)$ , are computed as follows. For the computation of  $\mathbb{P}(M_l^{(k)} \mid A_l^{(k)} = i, T_l^{(k)} = t)$ , let  $\mathbf{P} = (P_{ij})$  denote the mutation matrix, and let  $r_l^{(k)}$  specify the number of mutations that have occurred at the  $l$ th locus of the  $k$ th *D. melanogaster* sequence during time  $T_l^{(k)}$ . Then we have

$$\begin{aligned}
\mathbb{P}(M_l^{(k)} = j \mid A_l^{(k)} = i, T_l^{(k)} = t) &= \sum_{s=0}^\infty \mathbb{P}(r_l^{(k)} = s \mid T_l^{(k)} = t) (\mathbf{P}^s)_{ij} \\
&= \sum_{s=0}^\infty \left( \frac{\theta t}{2} \right)^s \frac{e^{-\theta t/2}}{s!} (\mathbf{P}^s)_{ij} \\
&= \sum_{s=0}^\infty \left[ \left( \frac{\theta t}{2} \mathbf{P} \right)^s \right]_{ij} \frac{e^{-\theta t/2}}{s!} \\
&= \left[ e^{\frac{\theta t}{2} (\mathbf{P} - \mathbf{I})} \right]_{ij},
\end{aligned}$$

where  $\mathbf{I}$  is the identity matrix with the same dimensions as  $\mathbf{P}$ . The computation for  $\mathbf{P}(S_l \mid A_l^{(k)} = j, T_l^{(k)} = t)$  is analogous.

After computing  $\mathbb{P}(A_l^{(k)} = i \mid M^{(k)}, S)$  for every  $k$  and given  $l$ , we heuristically aggregate these pairwise probabilities to estimate  $\mathbb{P}(A_l^{(k)} = i \mid M^{(1)}, \dots, M^{(n)}, S)$  as follows. Let  $\bar{t}_l^{(k)}$  be the posterior mean of  $f_l^{(k)}(t \mid M^{(k)}, S)$ , i.e.:

$$\bar{t}_l^{(k)} = \int_0^\infty t f_l^{(k)}(t \mid M^{(k)}, S) dt,$$

and define  $\tau_l = \max_k \bar{t}_l^{(k)}$ . We approximate  $\mathbb{P}(A_l^{(k)} = i \mid M^{(1)}, \dots, M^{(n)}, S)$  as

$$\mathbb{P}(A_l^{(k)} = i \mid M^{(1)}, \dots, M^{(n)}, S) \approx \frac{\sum_{k=1}^n \mathbb{P}(A_l^{(k)} = i \mid M^{(k)}, S) f_l^{(k)}(\tau_l \mid M_l^{(k)}, S_l)}{\sum_j \sum_{k=1}^n \mathbb{P}(A_l^{(k)} = j \mid M^{(k)}, S) f_l^{(k)}(\tau_l \mid M_l^{(k)}, S_l)},$$

which is a weighted average of  $\mathbb{P}(A_l^{(k)} = i \mid M^{(k)}, S)$  over  $k$ , weighted by the density of the TMRCA evaluated at  $\tau_l$  for each  $k$ . This averaging ought to mitigate effects such as genotyping errors and incomplete lineage sorting in individual *D. melanogaster* genomes.

## References

1. Jenkins PA, Song YS (2009) Closed-form two-locus sampling distributions: accuracy and universality. *Genetics* 183: 1087–1103.
2. Jenkins PA, Song YS (2012) Padé approximants and exact two-locus sampling distributions. *Annals of Applied Probability* 22: 576–607.
3. Li H, Durbin R (2011) Inference of human population history from individual whole-genome sequences. *Nature* 475: 493–496.
